# Supplementary material
Source: publisher site journal article supplement (https://www.dovepress.com/article/170144)

**Supplemental Table S1. The 19-item Chinese version of the Diabetes Medication Self-efficacy Scale**

**中文版糖尿病用药自我效能感量表**

| <b>当发生以下情况时，您对使用糖尿病药物有多少信心？</b> | <b>没有信心</b> | <b>有一些信心</b> | <b>非常有信心</b> |
|---------------------------------|-------------|--------------|--------------|
| 1. 当您在家忙时                       | 1           | 2            | 3            |
| 2. 当没有人提醒您时                     | 1           | 2            | 3            |
| 3. 当药物产生一些副作用时                  | 1           | 2            | 3            |
| 4. 当您担忧您的余生都得使用药物时              | 1           | 2            | 3            |
| 5. 当药物花了很多钱时                    | 1           | 2            | 3            |
| 6. 当您因工作或其他活动而回家晚时              | 1           | 2            | 3            |
| 7. 当您没有任何糖尿病的症状时                | 1           | 2            | 3            |
| 8. 当您和您的家庭成员在一起时                | 1           | 2            | 3            |
| 9. 当您在公共场所时                     | 1           | 2            | 3            |
| 10. 当您感觉您不需要药物时                 | 1           | 2            | 3            |
| 11. 当您旅行时                       | 1           | 2            | 3            |
| 12. 当您每天用药次数不止一次时               | 1           | 2            | 3            |
| 13. 当使用药物有时让您感觉很累时              | 1           | 2            | 3            |
| 14. 当您还需要使用其他药物时                | 1           | 2            | 3            |
| 15. 当您感觉良好时                     | 1           | 2            | 3            |
| 16. 当您感到虚弱或紧张时                  | 1           | 2            | 3            |
| 17. 当您困惑时                       | 1           | 2            | 3            |
| 18. 当您视物模糊时                     | 1           | 2            | 3            |
| 19. 当您头痛时                       | 1           | 2            | 3            |

**Supplemental Figure S1. Flowchart of the study**

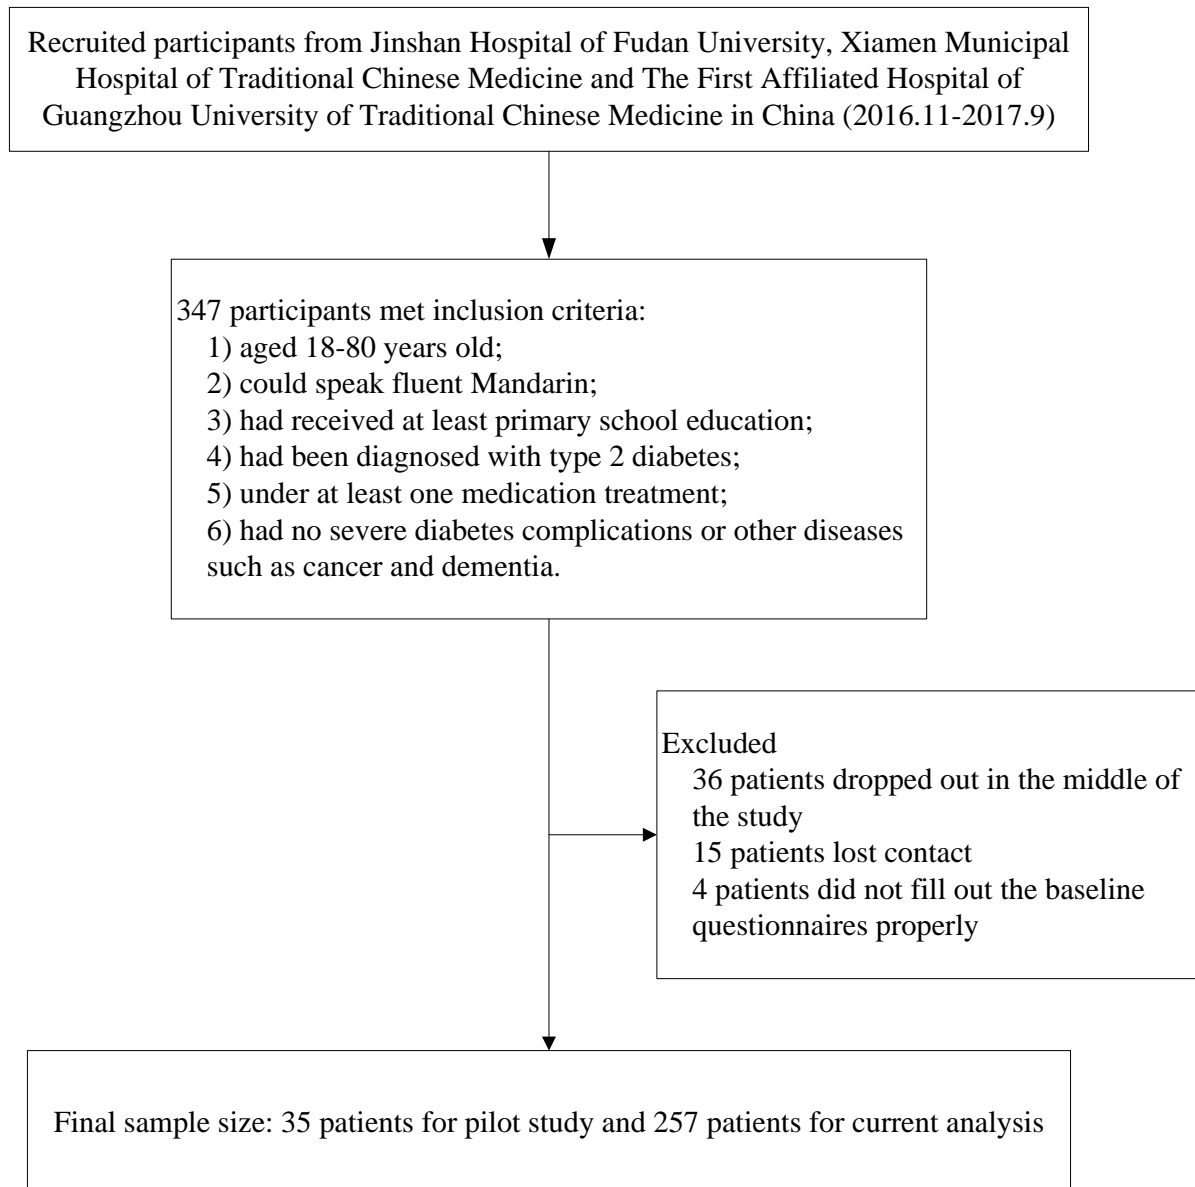

Supplement: Supplementary file 1 [file get_supplementary_file.php]
